# Supplementary material for: Mechanistic understanding of the increased photoactivity of TiO2 nanosheets upon tantalum doping
Source: Royal Society of Chemistry journal article supplement (doi:10.1039/d1cp03907e), 2021-12-17
Supplement: d1cp03907e1.pdf [file d1cp03907e1.pdf]

# Mechanistic understanding of the increased photoactivity of TiO<sub>2</sub> nanosheets upon tantalum doping

Hanggara Sudrajat<sup>a,b,c,\*</sup>, Sri Hartuti<sup>d</sup>, Sandhya Babel<sup>e</sup>

<sup>a</sup>Department of Chemical Engineering, Faculty of Engineering, Universitas Jember, Jember, Indonesia

<sup>b</sup>Division of Computational Physics, Institute for Computational Science, Ton Duc Thang University, Ho Chi Minh City, Viet Nam

<sup>c</sup>Faculty of Applied Sciences, Institute for Computational Science, Ton Duc Thang University,  
Ho Chi Minh City, Viet Nam

<sup>d</sup>Department of Environmental and Renewable Energy Systems, School of Engineering, Gifu University, Gifu, Japan

<sup>e</sup>School of Biochemical Engineering and Technology, Sirindhorn International Institute of Technology, Thammasat University, Pathum Thani, Thailand

\*Corresponding author. E-mail addresses: hanggara@unej.ac.id and  
hanggara.sudrajat@tdtu.edu.vn

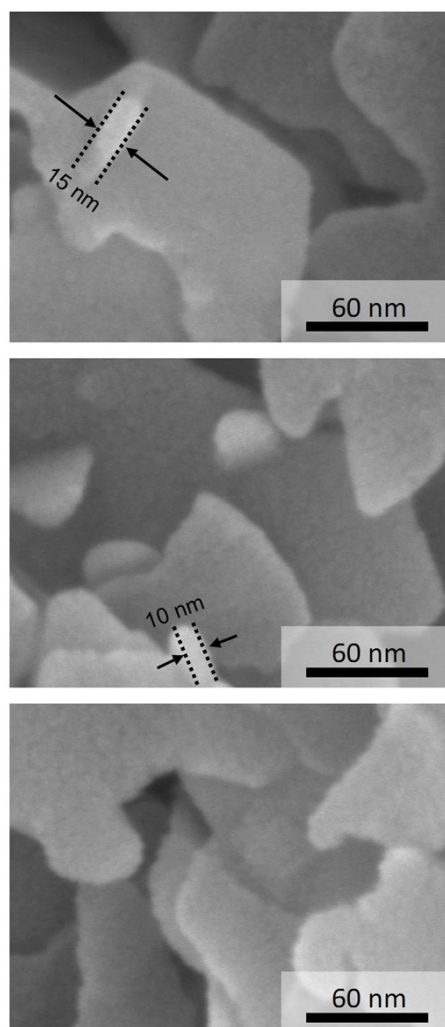

**Figure S1.** Scanning electron micrographs of  $\text{TiO}_2$  doped with 2 mol% of Ta.
